# Supplementary material for: Potential Role of Platelet-Activating C-Type Lectin-Like Proteins in Viper Envenomation Induced Thrombotic Microangiopathy Symptom
Source: MDPI journal article supplement (doi:10.3390/toxins12120749), 2020-11-27
Supplement: s1 [file s1]

# Supplementary Materials: Potential Role of Platelet-Activating C-Type Lectin-Like Proteins in Viper Envenomation Induced Thrombotic Microangiopathy Symptom

Chengbo Long, Ming Liu, Huiwen Tian, Ya Li, Feilong Wu, James Mwangi, Qiumin Lu, Tarek Mohamed Abd El-Aziz, Ren Lai and Chuanbin Shen

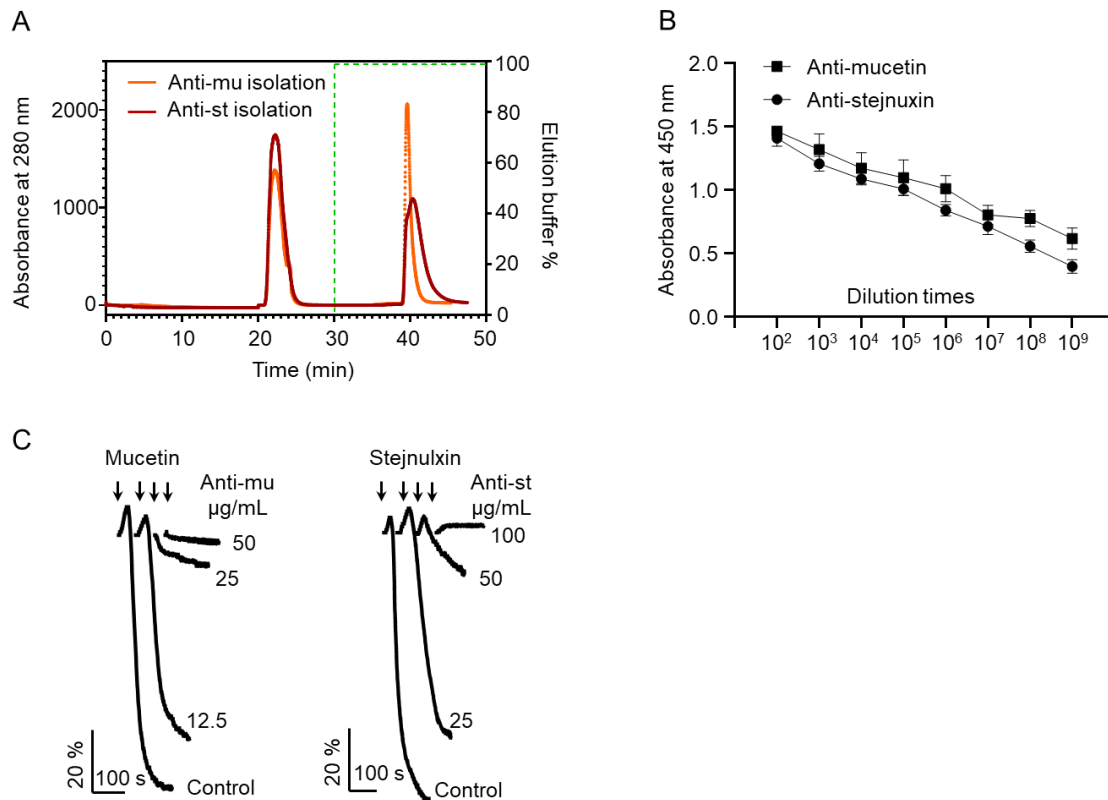

**Figure S1.** Purification, titer and function analysis of polyclonal antibody against mucetin and stejnulxin. **(A)** Purification of IgG from the serum of rabbits immunized with mucetin or stejnulxin. **(B)** The titer of polyclonal antibodies were detected by enzyme-linked immunosorbent assay (ELISA). **(C)** Effect of the purified antibodies against 1 µg/mL mucetin or stejnulxin induced human platelet aggregation.

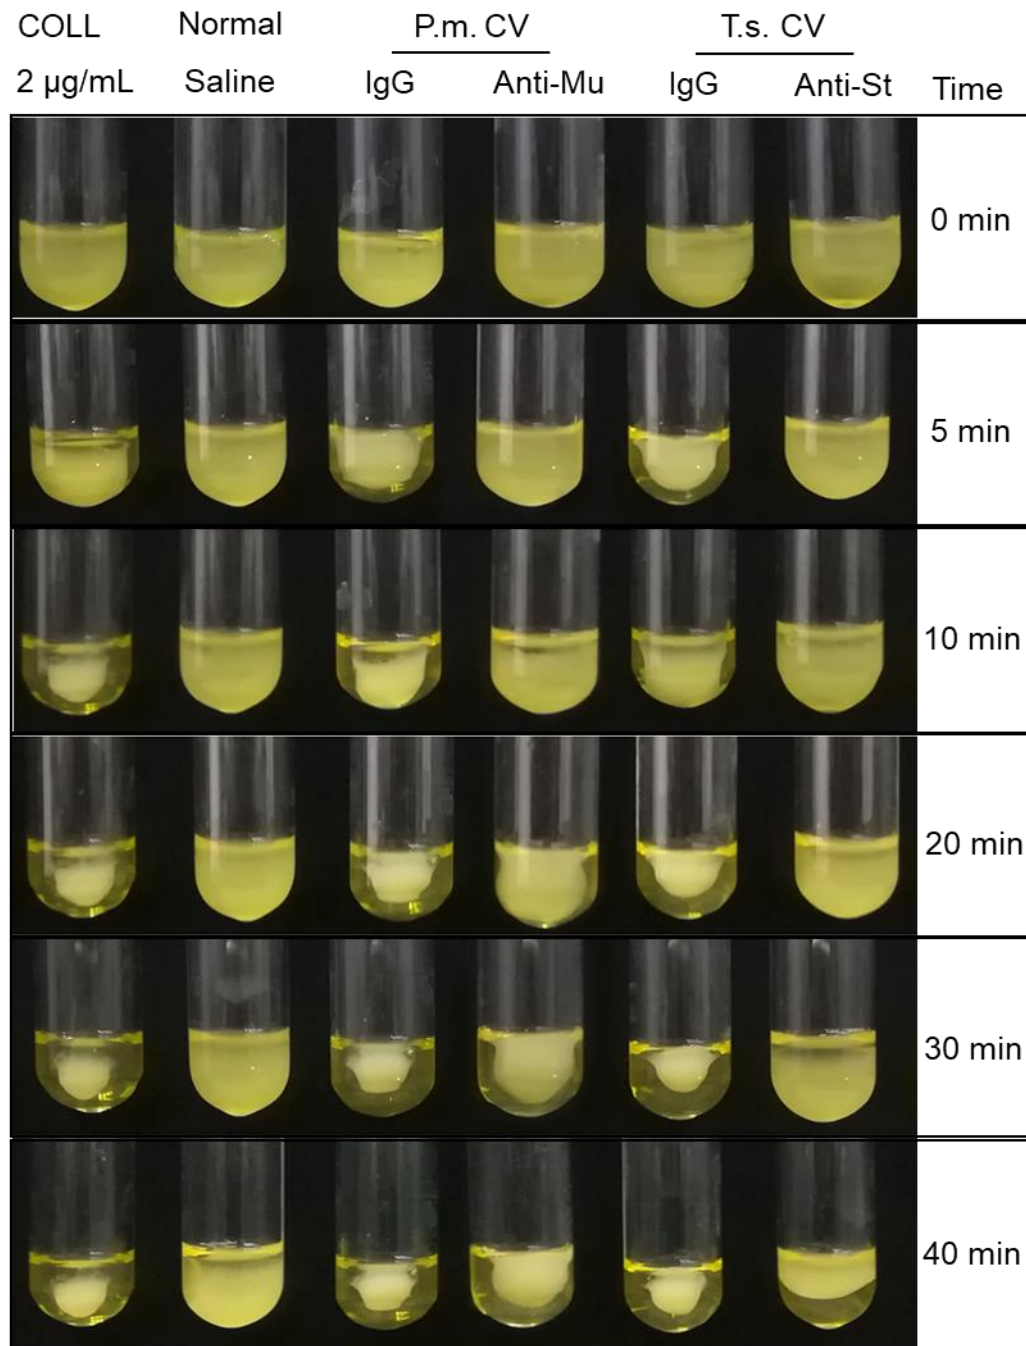

**Figure S2.** Purified polyclonal antibody against mucetin and stejnulxin inhibited the clot retraction induced by the crude venoms of *P. mucrosquamatus* and *T. stejnegeri*.

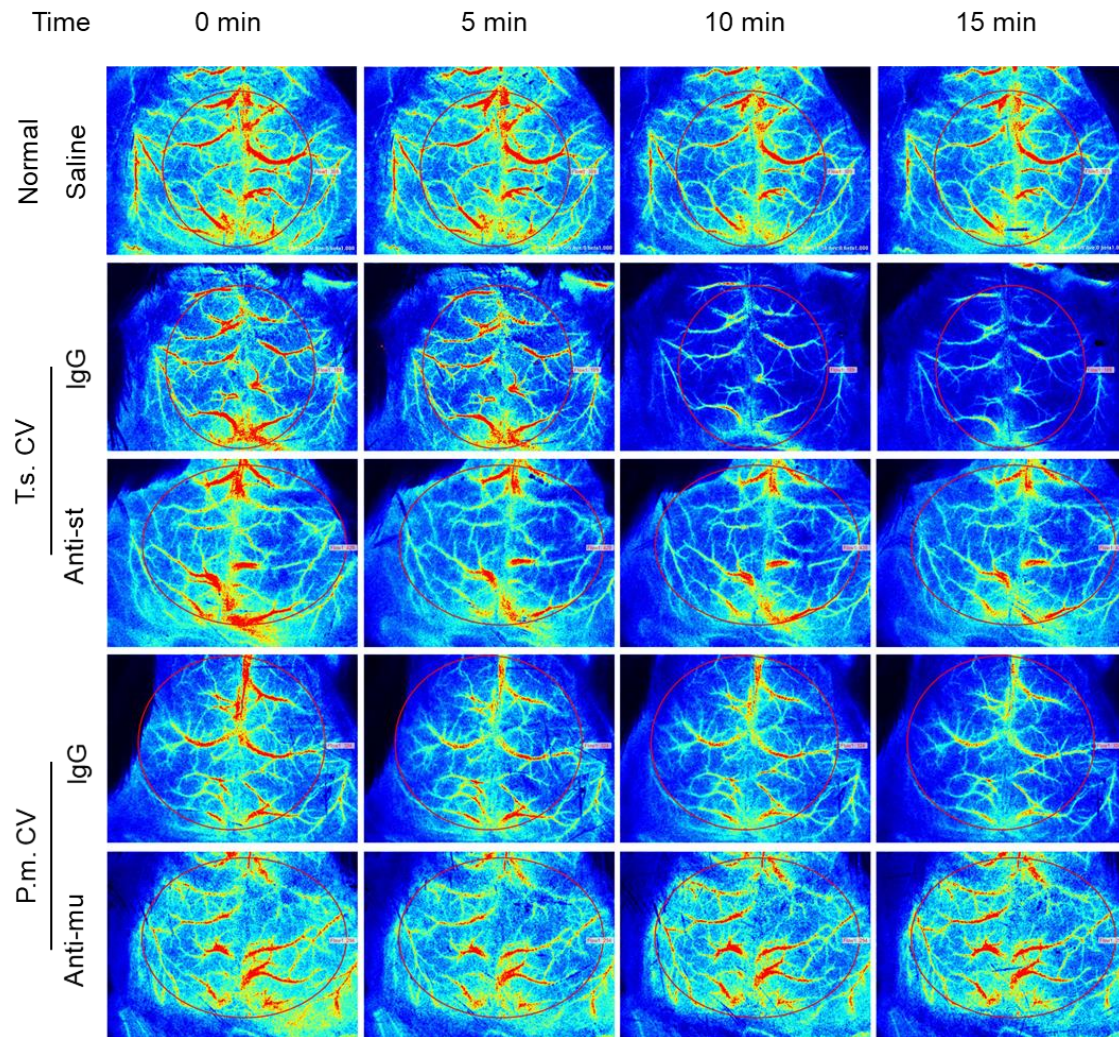

**Figure S3.** Purified polyclonal antibody against mucetin and stejnulxin inhibited the cerebral ischemia induced by the crude venoms of *P. mucrosquamatus* and *T. stejnegeri*.
